# Supplementary material
Source: PubMed Central journal article supplement (PMC4287940)

# Predictor training and testing - Workflow

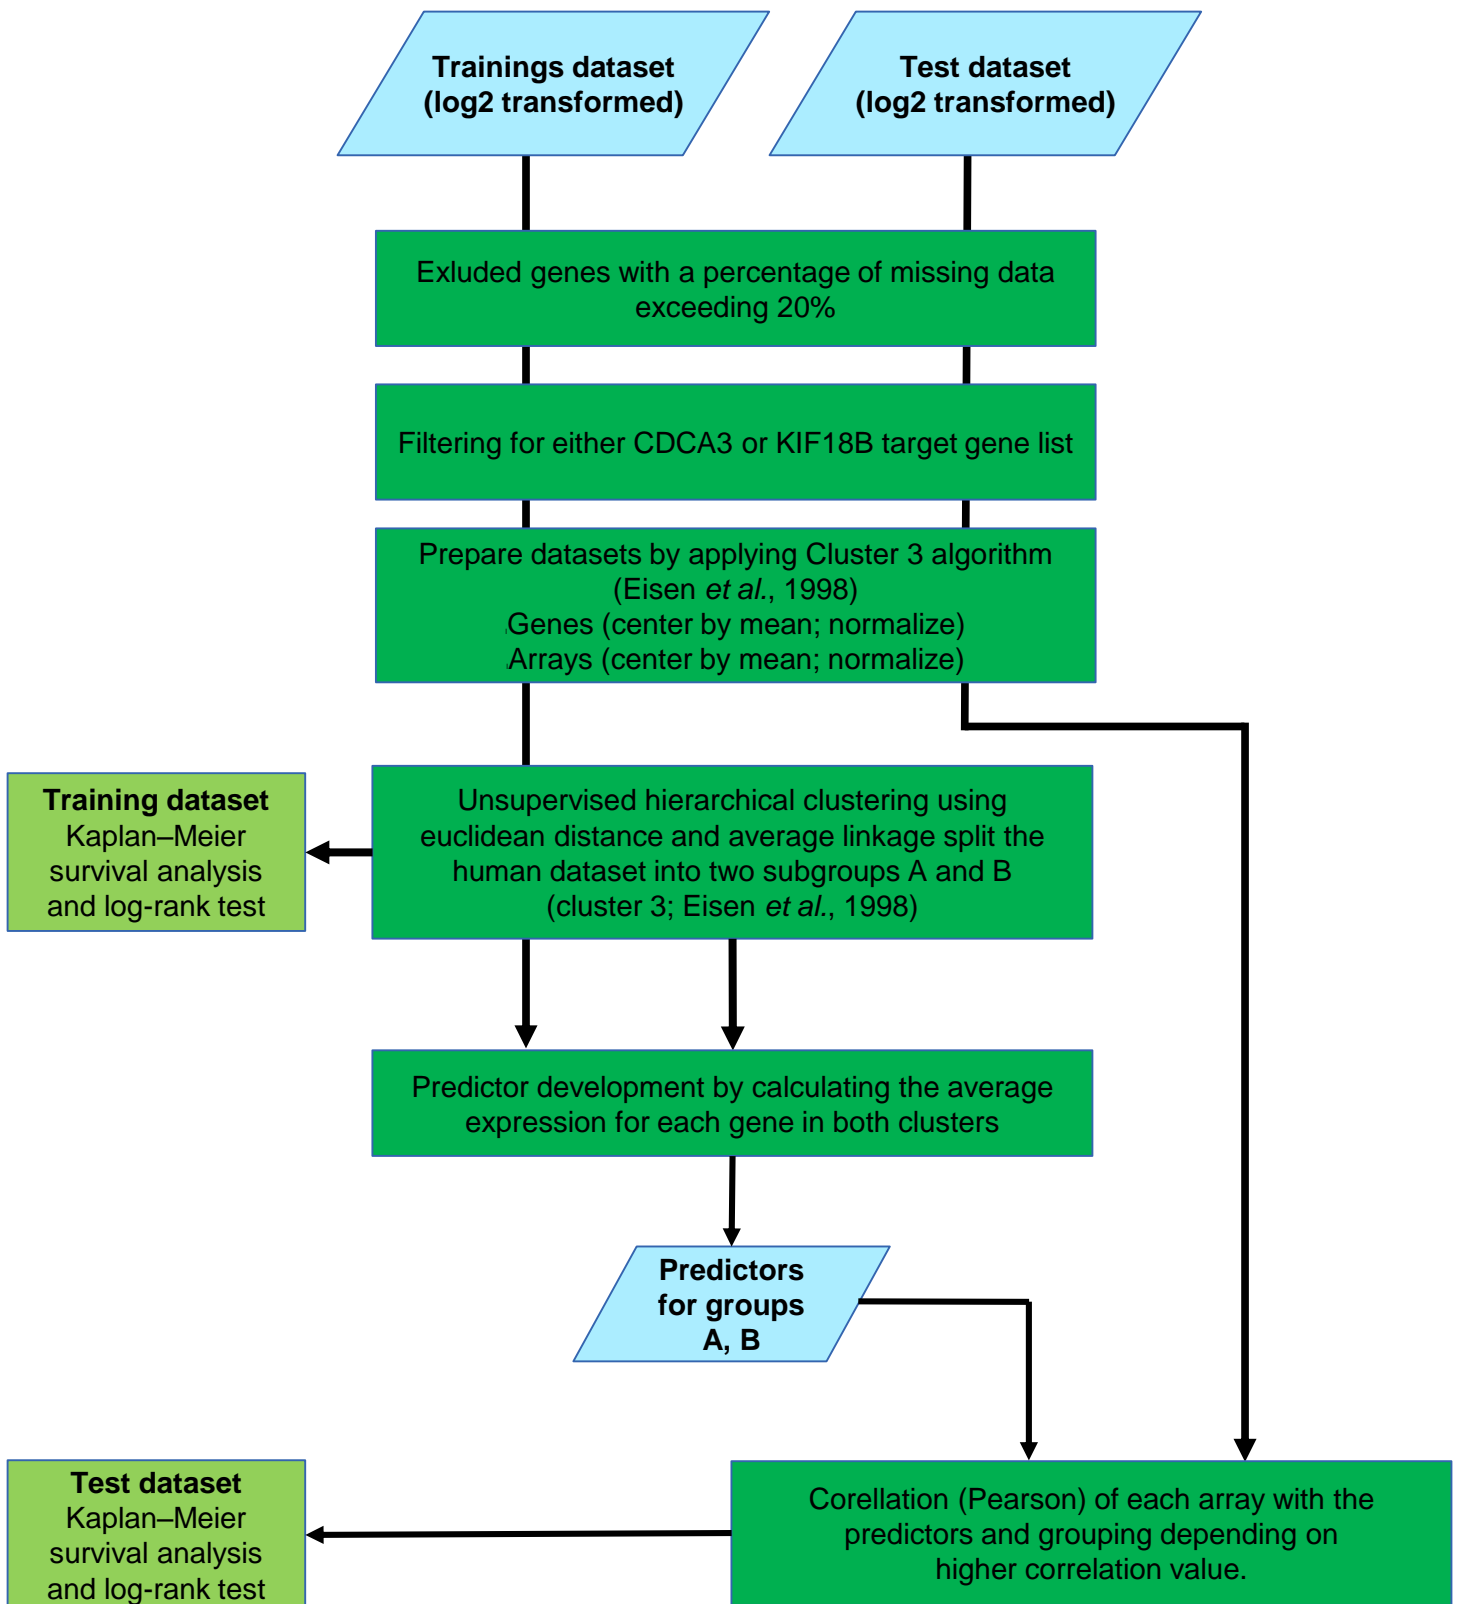

Supplement: supp_btu586_Suppl._Figure_1.pdf [file supp_btu586_Suppl._Figure_1.pdf]
